# Supplementary material for: Adipokines and Endotoxemia Correlate with Hepatic Steatosis in Non-Alcoholic Fatty Liver Disease (NAFLD)
Source: PubMed Central journal article supplement (PMC7146245; doi:10.3390/nu12030699), 2020-03-05
Supplement: nutrients-12-00699-s001.pdf [file nutrients-12-00699-s001.pdf]

## Supplementary Material: Adipokines and Endotoxemia Correlate with Hepatic Steatosis in Non-Alcoholic Fatty Liver Disease (NAFLD)

Anika Nier <sup>1</sup>, Yvonne Huber <sup>2</sup>, Christian Labenz <sup>2</sup>, Maurice Michel <sup>2</sup>, Ina Bergheim <sup>1</sup> and Jörn M. Schattenberg <sup>2,\*</sup>

<sup>1</sup> Department of Nutritional Sciences, Molecular Nutritional Science, University of Vienna, Austria

<sup>2</sup> Metabolic Liver Research Program, I. Department of ~~Internal~~-Medicine, University Medical Centre of the Johannes Gutenberg-University, Langenbeckstrasse 1, 55131 Mainz, Germany

Correspondence: joern.schattenberg@unimedizin-mainz.de; Telephone: +49 (0) 6131 17 6074, Telefax: +49 (0) 6131 17 477282

**Table S1: Characteristics of Healthy Controls and Patients with Non-alcoholic fatty liver disease (NAFLD) Steatosis**

| Parameter                                    | Controls    | NAFLD          |
|----------------------------------------------|-------------|----------------|
| n                                            | 14          | 63             |
| Age                                          | 47.4 ± 1.2  | 49.8 ± 1.6     |
| Sex [m/f]                                    | 4/10        | 33/30          |
| BMI [kg/m <sup>2</sup> ]                     | 23.3 ± 0.7  | 31.5 ± 0.7 *   |
| Waist circumference [cm]                     | 77.1 ± 2.3  | 107.9 ± 1.7 *  |
| ALT activity [U/l]                           | 18.4 ± 1.5  | 70.6 ± 5.6 *   |
| AST activity [U/l]                           | 18.4 ± 1.4  | 45.8 ± 2.8 *   |
| γ-GT activity [U/l]                          | 18.4 ± 2.3  | 123.9 ± 22.2 * |
| Systolic Blood Pressure [mmHg] <sup>#</sup>  | 124.4 ± 2.6 | 140.1 ± 2.4 *  |
| Diastolic Blood Pressure [mmHg] <sup>#</sup> | 82.3 ± 1.7  | 87.9 ± 1.2 *   |
| Triglycerides [mg/dl]                        | 87.0 ± 16.1 | 169.3 ± 10.5 * |
| Total Cholesterol [mg/dl]                    | 195.6 ± 7.2 | 222.1 ± 5.6 *  |
| HDL-Cholesterol [mg/dl]                      | 72.9 ± 3.4  | 48.9 ± 1.8 *   |
| LDL-Cholesterol [mg/dl]                      | 107.2 ± 6.7 | 139.0 ± 5.0 *  |
| Fasting Blood Glucose [mg/dl] <sup>#</sup>   | 79.2 ± 2.8  | 113.8 ± 4.9 *  |
| Fasting Insulin [mU/l] <sup>#</sup>          | 4.4 ± 0.4   | 20.4 ± 5.1 *   |
| HOMA-IR <sup>#</sup>                         | 0.9 ± 0.1   | 8.6 ± 3.8 *    |
| Uric Acid [mg/dl]                            | 4.2 ± 0.3   | 6.2 ± 0.2 *    |

ALT: alanine aminotransferase, AST: aspartate aminotransferase, γ-GT: γ- glutamyltransferase; Data are shown as total numbers or mean ± standard error of mean (SEM). \*  $p \leq 0.05$  NAFLD compared to controls. <sup>#</sup>missing data: blood pressure: n=1, insulin: n=5, fasting glucose: n=1, HOMA: n=6.

**Table S2: Nutritional Intake of Healthy Controls and Patients with Steatosis-NAFLD**

| Parameter            | Controls        | NAFLD           |
|----------------------|-----------------|-----------------|
| n                    | 12 <sup>#</sup> | 62 <sup>#</sup> |
| Total Energy [kcal/] | 2194 ± 185      | 2116 ± 70       |

|                     |          |          |
|---------------------|----------|----------|
| Protein [g/d]       | 82 ± 8   | 83 ± 3   |
| Fat [g/d]           | 93 ± 10  | 93 ± 4   |
| Carbohydrates [g/d] | 242 ± 18 | 227 ± 10 |
| Fiber [g/d]         | 26 ± 2   | 19 ± 1 * |

Data are shown as total numbers or mean ± standard error of mean (SEM). \*  $p \leq 0.05$  NAFLD compared to controls. # 2 participants in the Control group and 1 participant in the NAFLD group were excluded from the nutritional analysis due to non-compliance in dietary assessment.

**Table S3: Markers of visceral fat accumulation, intestinal permeability and inflammation in healthy controls and patients with steatosisNAFLD.**

| Parameter            | Controls    | NAFLD         |
|----------------------|-------------|---------------|
| n                    | 14          | 38            |
| Leptin [ng/ml]       | 4.4 ± 0.7   | 13.1 ± 1.7 *  |
| Adiponectin [ng/ml]  | 53.2 ± 6.8  | 26.0 ± 2.9 *  |
| Leptin/Adiponectin   | 0.08 ± 0.02 | 0.59 ± 0.08 * |
| Endotoxin [EU/ml]    | 0.66 ± 0.03 | 1.49 ± 0.12 * |
| LPB [µg/ml]#         | 25.1 ± 1.9  | 25.7 ± 1.7    |
| PAI-1 Activity [U/l] | 10.63 ± 2.2 | 47.6 ± 3.4 *  |
| CRP [mg/l]           | 1.7 ± 0.6   | 4.8 ± 0.7 *   |

CRP: c-reactive protein, LBP: lipopolysaccharide binding protein, PAI-1: plasminogen activator inhibitor-1; Data are shown as total numbers or mean ± standard error of mean (SEM). <sup>a</sup>  $p \leq 0.05$  compared to controls. #missing data (n=1)
